# Supplementary material for: Ascomycetes versus Spent Mushroom Substrate in Mycoremediation of Dredged Sediments Contaminated by Total Petroleum Hydrocarbons: The Involvement of the Bacterial Metabolism
Source: MDPI journal article supplement (doi:10.3390/w13213040), 2021-11-01
Supplement: s1 [file s1]

Archive with 1 entries (1 files):
- water-1437810-supplementary.pdf
