# Supplementary material for: Ascomycetes versus Spent Mushroom Substrate in Mycoremediation of Dredged Sediments Contaminated by Total Petroleum Hydrocarbons: The Involvement of the Bacterial Metabolism
Source: MDPI journal article supplement (doi:10.3390/w13213040), 2021-11-01
Supplement: s1 [file s1 › water-1437810-supplementary.pdf]

# Supplementary Materials:

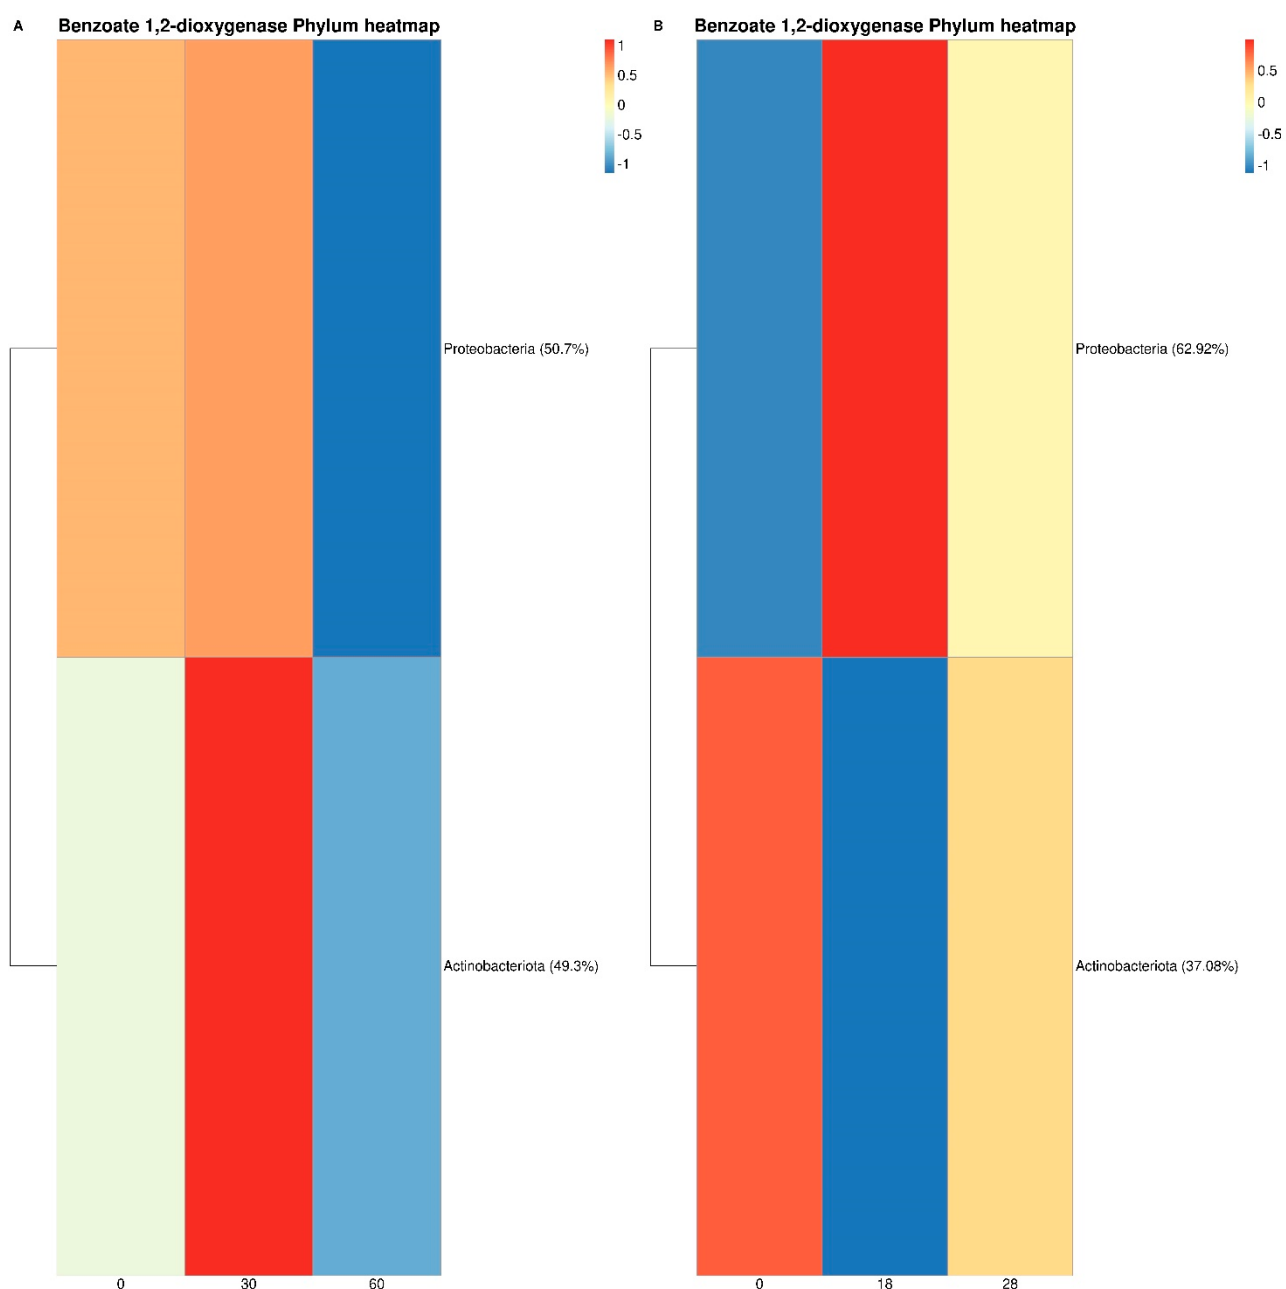

**Figure S1. Functional Heatmap for Benzoate 1,2- dioxygenase at Genus level.** Functional Heatmap showing SMS community (panel A) and *Lambertella* sp. MUT 5852 community (panel B), phylum contribution to Benzoate 1,2- dioxygenase (EC:1.14.12.10). Percentages reported near genus names represent the relative abundance of the sum of contribution of that genus per sample, against total sum of contributions: a cut-off value of 0.005% was chosen. Hierarchical clustering was performed on rows by Pearson correlation, based on Euclidean distance. In order to evidence variation, a colour scheme that represents row-wise Z-scores of per genus contributions per sample, was chosen. For this colour scheme, a Z value of 0 matches the reported percentage near the genus contributor.

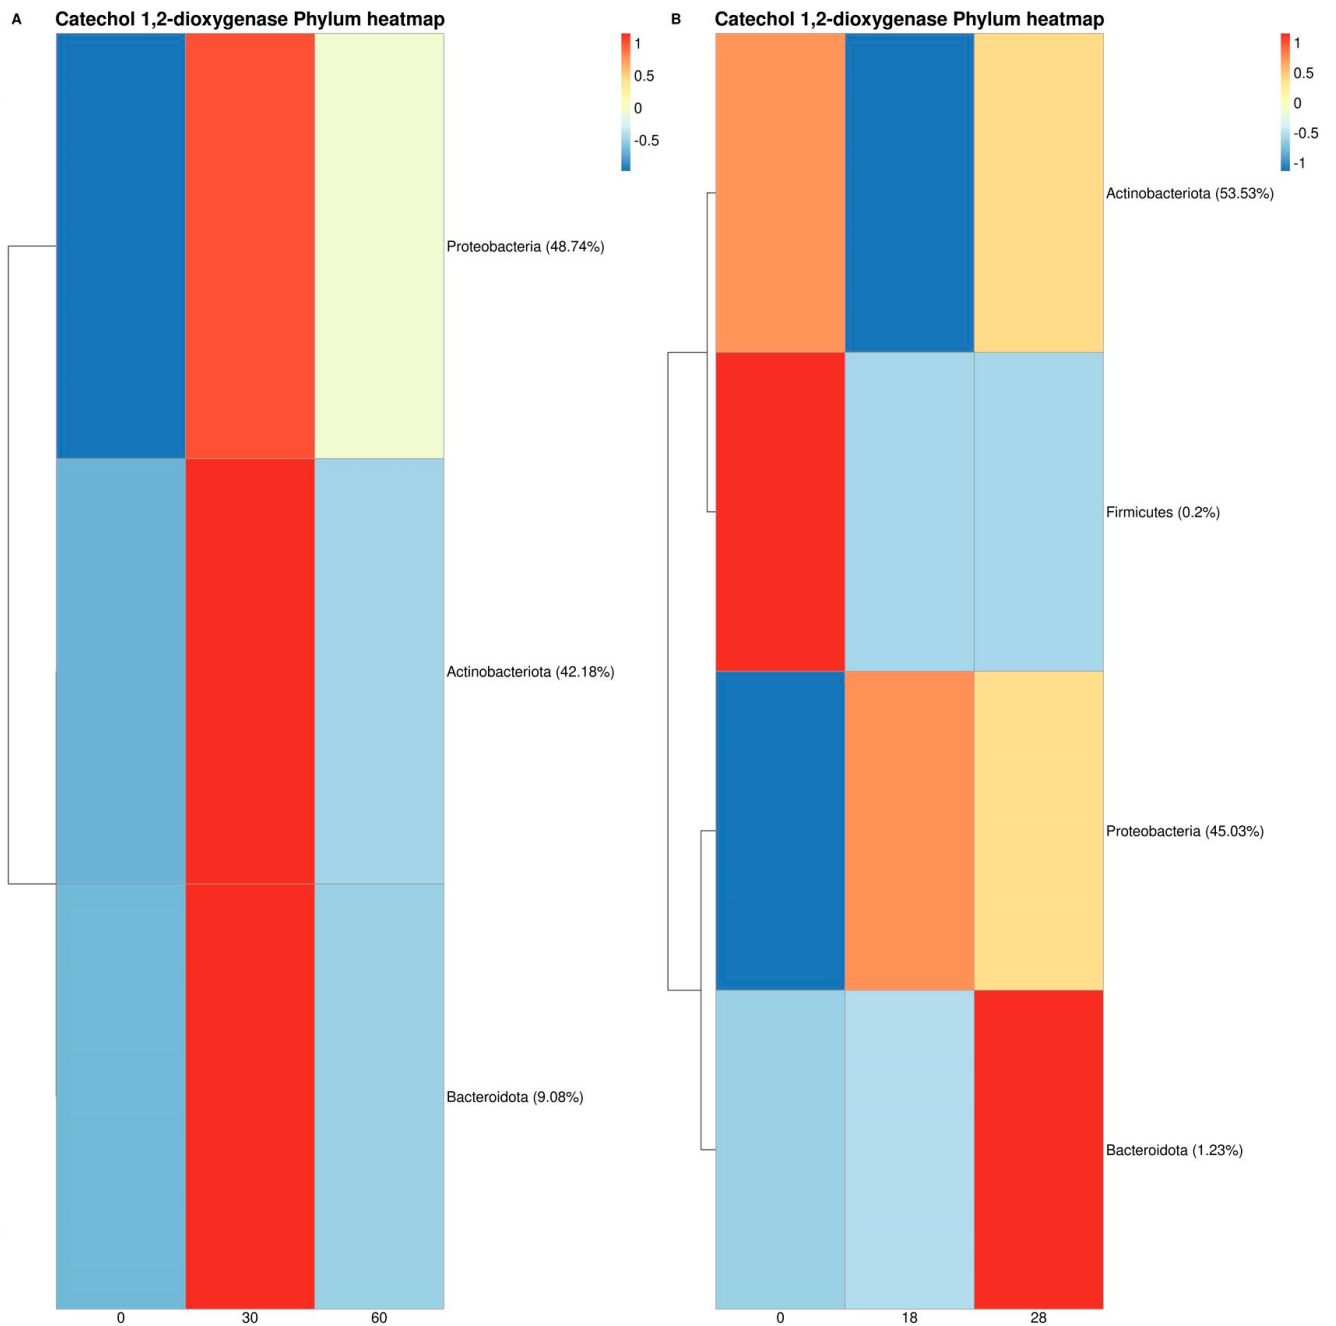

**Figure S2. Functional Heatmap for Catechol 1,2- dioxygenase at Genus level.** Functional Heatmap showing SMS community (panel **A**) and *Lambertella* sp. MUT 5852 community (panel **B**), phylum contribution to Catechol 1,2- dioxygenase (EC:1.13.11.1). Percentages reported near genus names represent the relative abundance of the sum of contribution of that genus per sample, against total sum of contributions: a cut-off value of 0.005% was chosen. Hierarchical clustering was performed on rows by Pearson correlation, based on Euclidean distance. In order to evidence variation, a colour scheme that represents row-wise Z-scores of per genus contributions per sample, was chosen. For this colour scheme, a Z value of 0 matches the reported percentage near the genus contributor.

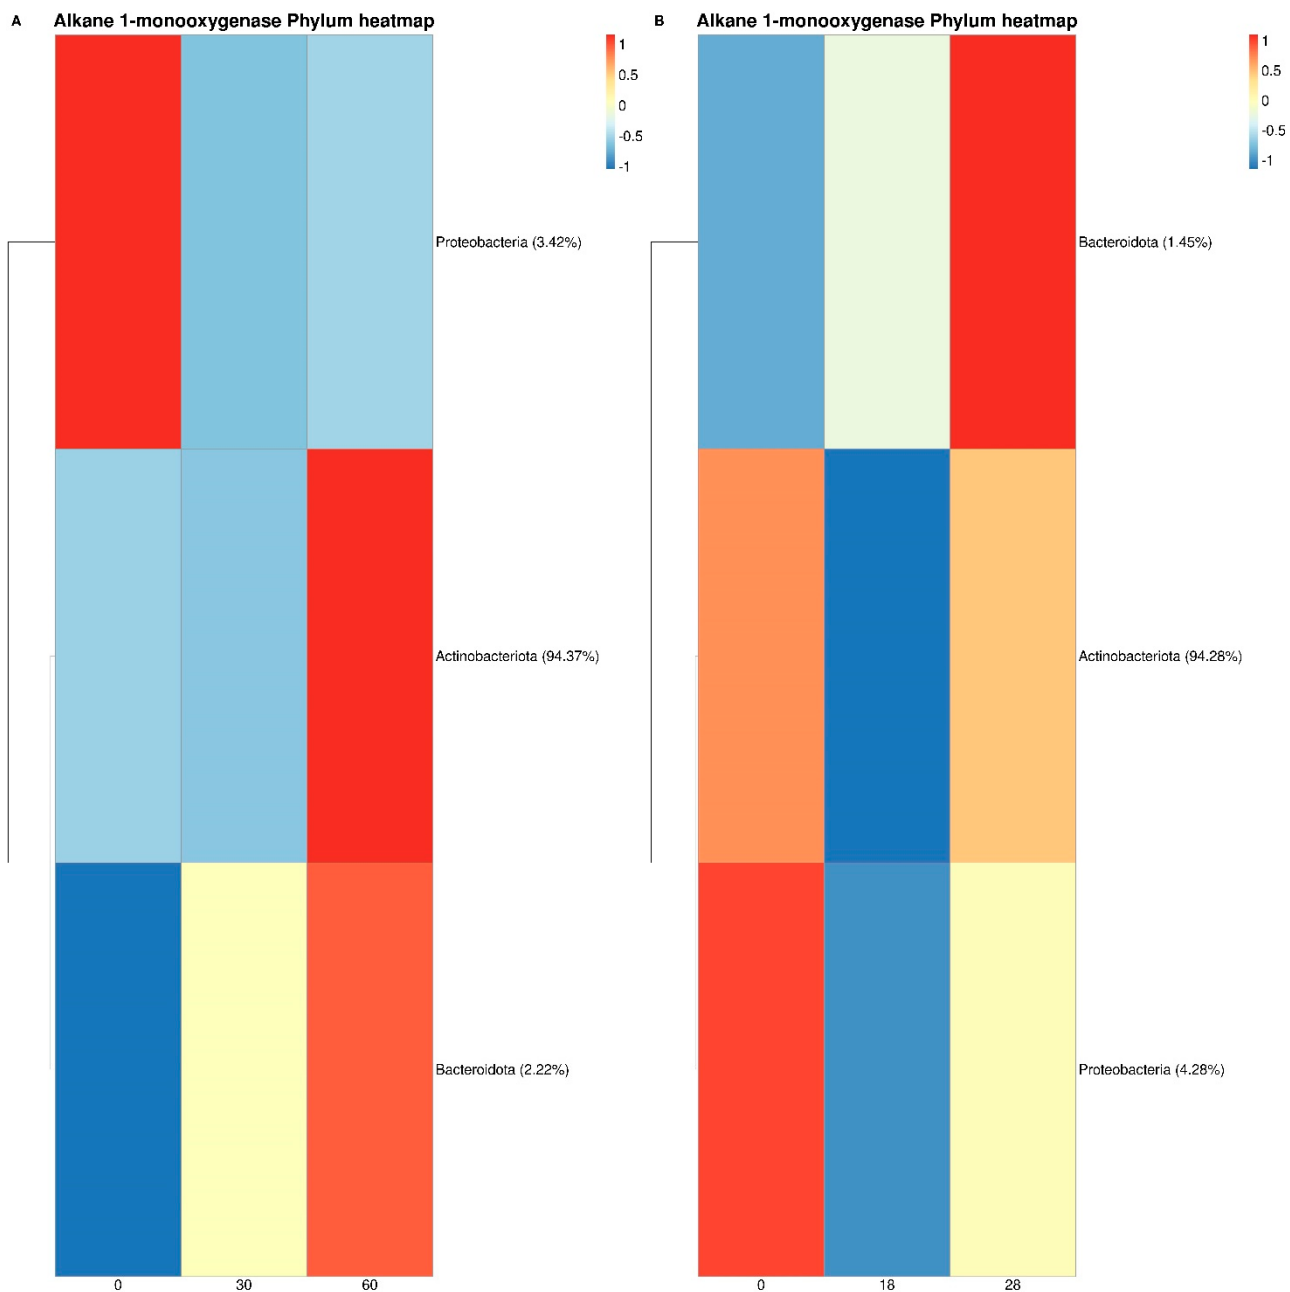

**Figure S3. Functional Heatmap for Alkane 1-monooxygenase at Genus level.** Functional Heatmap showing SMS community (panel A) and *Lambertella* sp. MUT 5852 community (panel B), phylum contribution to Alkane 1-monooxygenase (EC:1.14.15.3). Percentages reported near genus names represent the relative abundance of the sum of contribution of that genus per sample, against total sum of contributions: a cut-off value of 0.005% was chosen. Hierarchical clustering was performed on rows by Pearson correlation, based on Euclidean distance. In order to evidence variation, a colour scheme that represents row-wise Z-scores of per genus contributions per sample, was chosen. For this colour scheme, a Z value of 0 matches the reported percentage near the genus contributor.
